# Supplementary material for: Characteristic Poses in Ballet in the Case of a Retired Classical Ballerina after Bilateral THA: A Case Report and Review of Literature
Source: Case Rep Orthop. 2021 Jun 2;2021:5560581. doi: 10.1155/2021/5560581 (PMC8189802; doi:10.1155/2021/5560581)
Supplement: Supplementary Materials — Characteristic poses in ballet of this patient after bilateral THA (video). [file 5560581.f1.pdf]

**Characteristic poses in Ballet**  
**in the case of a retired classical ballerina after Bilateral THA**  
**-A cases report and review of literature-**

**Supplemental Files**

Characteristic poses in ballet of this patient after bilateral THA. (Video)

The patient was able to demonstrate the split position on the floor as an active classical ballerina

[https://drive.google.com/file/d/1q4lZ\\_W\\_Z6rHvbYZwHk44fp1\\_FZ5tcAWF/view?usp=sharing](https://drive.google.com/file/d/1q4lZ_W_Z6rHvbYZwHk44fp1_FZ5tcAWF/view?usp=sharing)

Hyogo College of Medicine  
1-1 Mukogawa-cho  
Nishinomiya City, Hyogo, Japan 663-8501  
Tel: 81-798-45-6452 Fax: 81-798-45-6453  
e-mail: morio1223.com@gmail.com
